# Supplementary material for: Hybridizing Fe3O4 nanocrystals with nitrogen-doped carbon nanowires for high-performance supercapacitors
Source: Royal Society of Chemistry journal article supplement (doi:10.1039/c7ra09723a), 2017-01-01
Supplement: c7ra09723a1.pdf [file c7ra09723a1.pdf]

## Supplementary Information

### Hybridizing Fe<sub>3</sub>O<sub>4</sub> nanocrystals with nitrogen-doped carbon nanowires for high-performance supercapacitors †

Jizhang Chen,<sup>\*a</sup> Qiongyu Chen,<sup>a</sup> Junling Xu<sup>b</sup> and Ching-Ping Wong<sup>b</sup>

<sup>a</sup> College of Materials Science and Engineering, Nanjing Forestry University, Nanjing 210037, China.

<sup>b</sup> Department of Electronic Engineering, The Chinese University of Hong Kong, New Territories, Hong Kong.

E-mail address: jizhang.chen@hotmail.com (J. Chen).

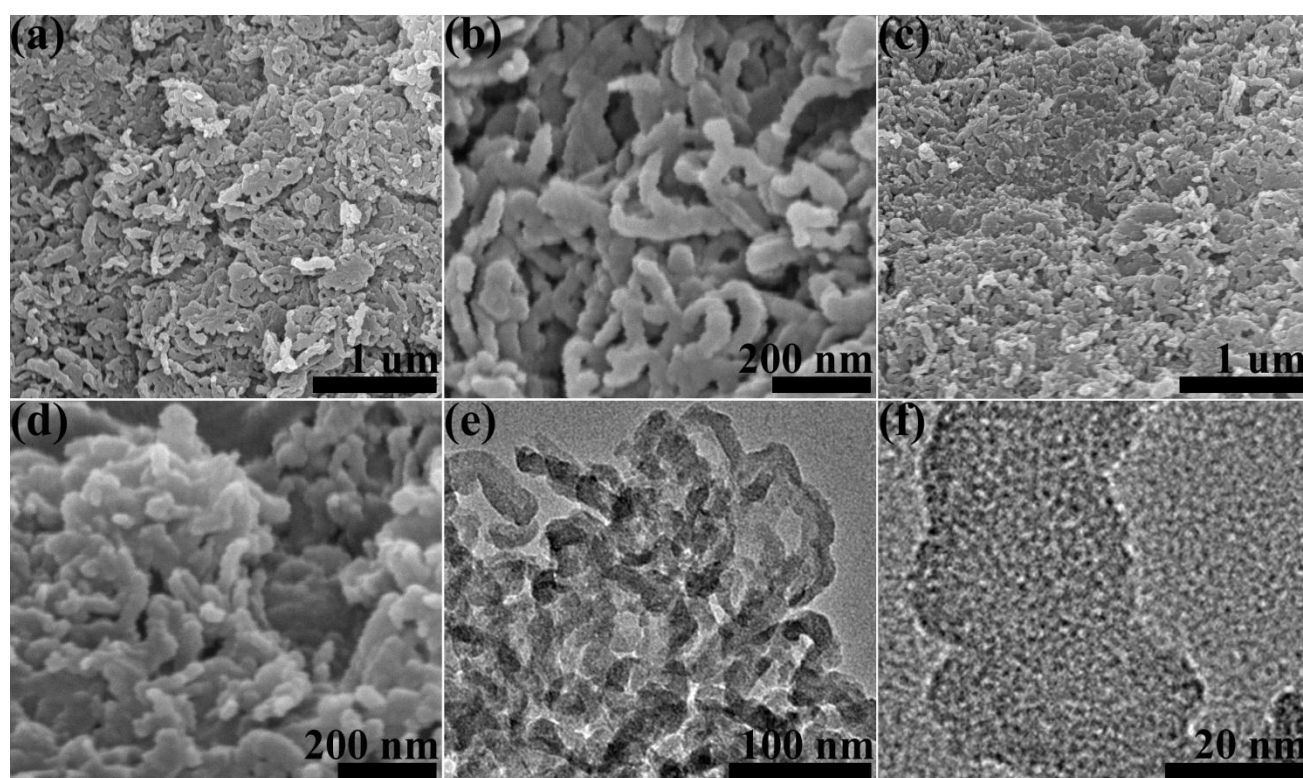

**Fig. S1** SEM and TEM images of (a, b) PPy nanowires and (c–f) NCN.

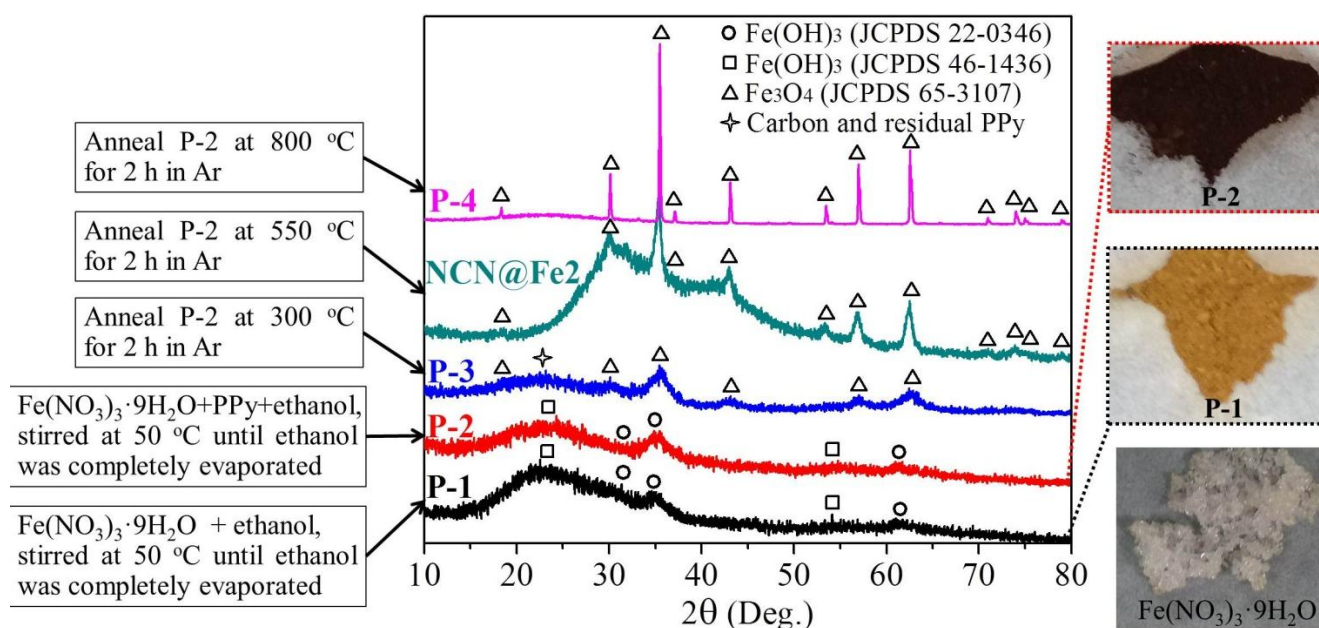

**Fig. S2** XRD patterns of different products when altering the raw material or annealing temperature.

P-1 is obtained without the addition of PPy. From the XRD pattern of P-1 and the photographs (on the right of XRD patterns), we can see that the Fe(NO<sub>3</sub>)<sub>3</sub>·9H<sub>2</sub>O precursor was hydrolyzed to Fe(OH)<sub>3</sub> after dissolved in ethanol and subsequently evaporating ethanol at 50 °C. When PPy was added, the product P-2 exhibits nearly the same XRD pattern as that of P-1. The signal from PPy is so weak that it is covered up by that of Fe(OH)<sub>3</sub>. After annealing P-2 at 300 °C for 2 h in Ar atmosphere, P-3 was obtained. Except for a hump arising from carbon and residual PPy, all the peaks of P-3 can be indexed to Fe<sub>3</sub>O<sub>4</sub> (JCPDS 65-3107). When the annealing temperature was increased to 550 °C, the obtained NCN@Fe2 keeps the Fe<sub>3</sub>O<sub>4</sub> phase and its crystallinity is much higher than that of P-3. When the annealing temperature was further increased to 800 °C, the obtained P-4 shows sharp peaks of Fe<sub>3</sub>O<sub>4</sub>, indicative of large particle size and rather high crystallinity.

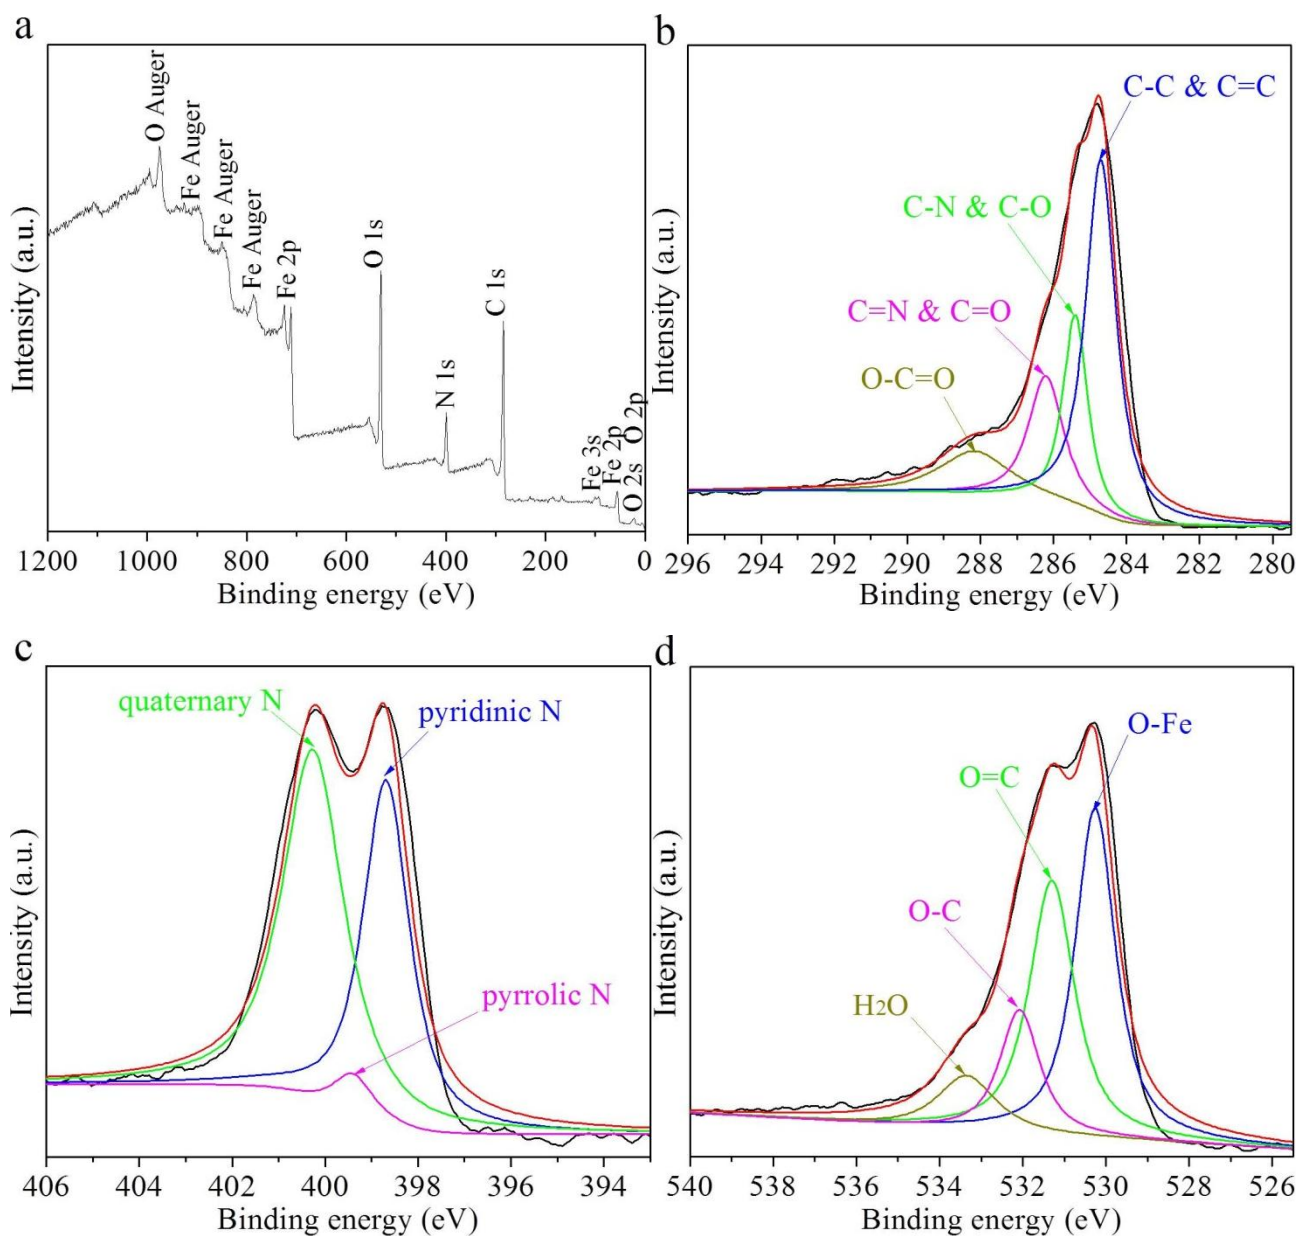

**Fig. S3** (a) Survey XPS spectrum and (b) C 1s, (c) N 1s, and (d) O 1s HR XPS spectra of NCN@Fe<sub>2</sub>.

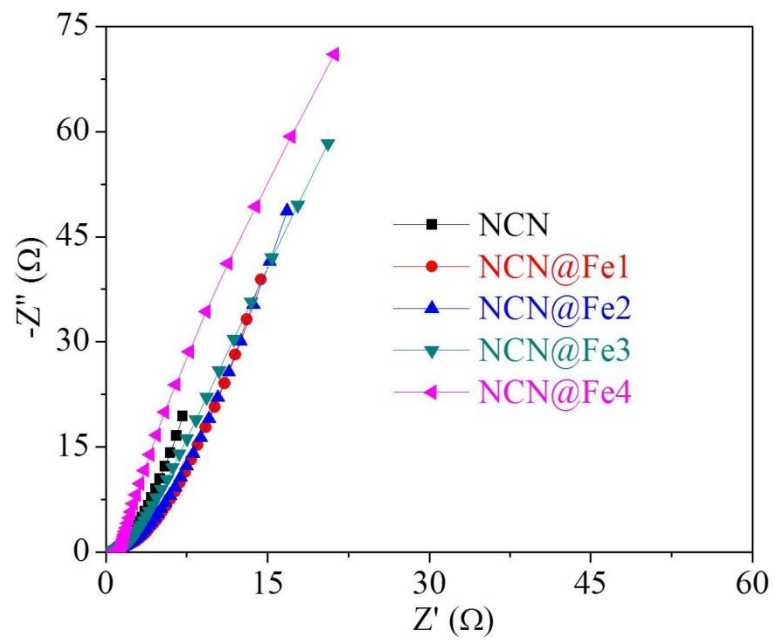

**Fig. S4** Nyquist plots of NCN, NCN@Fe1, NCN@Fe2, NCN@Fe3, and NCN@Fe4.

**Table S1** Specific capacitance of NCN@Fe<sub>2</sub>O<sub>3</sub> versus Fe-based pseudocapacitive materials reported in recent three years, all tested in 3-electrode setups.

| Active material                                            | Electrolyte                           | Capacitance                                       | Ref. (Year)          |
|------------------------------------------------------------|---------------------------------------|---------------------------------------------------|----------------------|
| NCN@Fe <sub>2</sub> O <sub>3</sub>                         | 3 M KOH                               | 541.7 F g <sup>-1</sup> at 1 A g <sup>-1</sup>    | This work            |
| Ti-doped Fe <sub>2</sub> O <sub>3</sub> @PEDOT             | 5 M LiCl                              | 311.6 F g <sup>-1</sup> at 1 mA cm <sup>-2</sup>  | <sup>1</sup> (2015)  |
| graphene/Fe <sub>2</sub> O <sub>3</sub> QDs                | 1 M Na <sub>2</sub> SO <sub>4</sub>   | 347 F g <sup>-1</sup> at 10 mV s <sup>-1</sup>    | <sup>2</sup> (2015)  |
| α-Fe <sub>2</sub> O <sub>3</sub> hollow tubes              | 6 M KOH                               | 330 F g <sup>-1</sup> at 0.5 A g <sup>-1</sup>    | <sup>3</sup> (2016)  |
| FeOOH/Ag/ZnO nanorods                                      | 0.5 M Li <sub>2</sub> SO <sub>4</sub> | 376.6 F g <sup>-1</sup> at 1 A g <sup>-1</sup>    | <sup>4</sup> (2016)  |
| hollow and porous Fe <sub>2</sub> O <sub>3</sub>           | 0.5 M Na <sub>2</sub> SO <sub>3</sub> | 346 F g <sup>-1</sup> at 2 mV s <sup>-1</sup>     | <sup>5</sup> (2016)  |
| Fe <sub>2</sub> O <sub>3</sub> nanotubes                   | 1 M Li <sub>2</sub> SO <sub>4</sub>   | 300.1 F g <sup>-1</sup> at 0.75 A g <sup>-1</sup> | <sup>6</sup> (2016)  |
| VACNTs@Fe <sub>2</sub> O <sub>3</sub>                      | 2 M KOH                               | 248 F g <sup>-1</sup> at 8 A g <sup>-1</sup>      | <sup>7</sup> (2016)  |
| Fe <sub>2</sub> O <sub>3</sub> @N-doped graphene           | 2 M KOH                               | 274 F g <sup>-1</sup> at 1 A g <sup>-1</sup>      | <sup>8</sup> (2016)  |
| graphene/FeOOH QDs                                         | 1 M Li <sub>2</sub> SO <sub>4</sub>   | 365 F g <sup>-1</sup> at 10 mV s <sup>-1</sup>    | <sup>9</sup> (2016)  |
| rGO/Fe <sub>3</sub> O <sub>4</sub> nanoparticles           | 1 M KOH                               | 241 F g <sup>-1</sup> at 1 A g <sup>-1</sup>      | <sup>10</sup> (2016) |
| rGO/Fe <sub>2</sub> O <sub>3</sub> nanotubes               | 1 M Na <sub>2</sub> SO <sub>4</sub>   | 262.2 F g <sup>-1</sup> at 1 A g <sup>-1</sup>    | <sup>11</sup> (2017) |
| Fe <sub>2</sub> O <sub>3</sub> @C-rGO                      | 1 M Na <sub>2</sub> SO <sub>4</sub>   | 211.4 F g <sup>-1</sup> at 0.5 A g <sup>-1</sup>  | <sup>12</sup> (2017) |
| Fe <sub>3</sub> O <sub>4</sub> @hollow graphite            | 4 M KOH                               | 481 F g <sup>-1</sup> at 1 A g <sup>-1</sup>      | <sup>13</sup> (2017) |
| rGO/Fe <sub>3</sub> O <sub>4</sub> nanoparticles           | 2 M KOH                               | 455 F g <sup>-1</sup> at 8 mV s <sup>-1</sup>     | <sup>14</sup> (2017) |
| Fe <sub>2</sub> O <sub>3</sub> @MnO <sub>2</sub> nanotubes | 3 M KOH                               | 289.9 F g <sup>-1</sup> at 1 A g <sup>-1</sup>    | <sup>15</sup> (2017) |
| Fe <sub>2</sub> O <sub>3</sub> nanorods                    | 2 M KOH                               | 516.7 F g <sup>-1</sup> at 1 A g <sup>-1</sup>    | <sup>16</sup> (2017) |
| NiNTAs@Fe <sub>2</sub> O <sub>3</sub> nanoneedles          | 1 M Na <sub>2</sub> SO <sub>4</sub>   | 418.7 F g <sup>-1</sup> at 10 mV s <sup>-1</sup>  | <sup>17</sup> (2017) |

## References

- 1 Y. Zeng, Y. Han, Y. Zhao, Y. Zeng, M. Yu, Y. Liu, H. Tang, Y. Tong and X. Lu, *Adv. Energy Mater.*, 2015, **5**, 1402176.
- 2 H. Xia, C. Hong, B. Li, B. Zhao, Z. Lin, M. Zheng, S. V. Saviolov and S. M. Aldoshin, *Adv. Funct. Mater.*, 2015, **25**, 627-635.
- 3 J. Li, W. Zhang, G. Zan and Q. Wu, *Dalton T.*, 2016, **45**, 12790-12799.
- 4 S. Yang, Y. Li, T. Xu, Y. Li, H. Fu, K. Cheng, K. Ye, L. Yang, D. Cao and G. Wang, *RSC Adv.*, 2016, **6**, 39166-39171.
- 5 C. Fu, A. Mahadevegowda and P. S. Grant, *J. Mater. Chem. A*, 2016, **4**, 2597-2604.
- 6 Y.-G. Lin, Y.-K. Hsu, Y.-C. Lin and Y.-C. Chen, *Electrochimica. Acta*, 2016, **216**, 287-294.
- 7 W. Zhang, B. Zhao, Y. Yin, T. Yin, J. Cheng, K. Zhan, Y. Yan, J. Yang and J. Li, *J. Mater. Chem. A*, 2016, **4**, 19026-19036.
- 8 L. Liu, J. Lang, P. Zhang, B. Hu and X. Yan, *ACS Appl. Mater. Interf.*, 2016, **8**, 9335-9344.
- 9 J. Liu, M. Zheng, X. Shi, H. Zeng and H. Xia, *Adv. Funct. Mater.*, 2016, **26**, 919-930.
- 10 L. Li, P. Gao, S. Gai, F. He, Y. Chen, M. Zhang and P. Yang, *Electrochim. Acta*, 2016, **190**, 566-573.
- 11 D. M. G. T. Nathan and S. J. M. Bobby, *J. Alloys Compd.*, 2017, **700**, 67-74.
- 12 M. Zhang, J. Sha, X. Miao, E. Liu, C. Shi, J. Li, C. He, Q. Li and N. Zhao, *J. Alloys Compd.*, 2017, **696**, 956-963.
- 13 H. Khani and D. O. Wipf, *ACS Appl. Mater. Interf.*, 2017, **9**, 6967-6978.
- 14 R. Kumar, R. K. Singh, A. R. Vaz, R. Savu and S. A. Moshkalev, *ACS Appl. Mater. Interf.*, 2017, **9**, 8880-8890.
- 15 G. Nie, X. Lu, M. Chi, Y. Zhu, Z. Yang, N. Song and C. Wang, *Electrochim. Acta*, 2017, **231**, 36-43.
- 16 J. Wang, L. Zhang, X. Liu, X. Zhang, Y. Tian, X. Liu, J. Zhao and Y. Li, *Sci. Rep.*, 2017, **7**, 41088.
- 17 Y. Li, J. Xu, T. Feng, Q. Yao, J. Xie and H. Xia, *Adv. Funct. Mater.*, 2017, **27**, 1606728.
